# Supplementary material for: Male-Biased Adult Production of the Striped Fruit Fly, Zeugodacus scutellata, by Feeding dsRNA Specific to Transformer-2
Source: MDPI journal article supplement (doi:10.3390/insects11040211), 2020-03-28
Supplement: s1 [file s1]

**Table S1.** Primers used in this study for RT-qPCR

| Gene  | Primer sequence (5' - 3')                 | Annealing temperature (°C) | Purposes          |
|-------|-------------------------------------------|----------------------------|-------------------|
| Tra2  | GACATAGCGGATGCTAAA                        | 52                         | RT-PCR<br>RT-qPCR |
|       | TTGCGACTGTGATAAGG                         |                            |                   |
|       | TAATACGACTCACTATAGGGAGAGACATAGCGGATGCTAAA | 52                         | RNAi              |
|       | TAATACGACTCACTATAGGGAGATTGCGACTGTGATAAGG  |                            |                   |
| Actin | CAACACACCCGCCATGTATG                      | 50                         | RT-PCR<br>RT-qPCR |
|       | ACGAGTAGCCACGTTTCAGTC                     |                            |                   |
